## RESEARCH ARTICLE

# Long non-coding RNA as a potential diagnostic biomarker in head and neck squamous cell carcinoma: A systematic review and meta-analysis

Mahdi Masroui<sup>1</sup>✉, Shaghayegh Khanmohammadi<sup>1,2,3,4</sup>✉, Parisa Fallahtafti<sup>1</sup>, Nima Rezaei<sup>3,4,5\*</sup>

**1** School of Medicine, Tehran University of Medical Sciences, Tehran, Iran, **2** Non-Communicable Diseases Research Center, Endocrinology and Metabolism Population Sciences Institute, Tehran University of Medical Sciences, Tehran, Iran, **3** Research Center for Immunodeficiencies, Pediatrics Center of Excellence, Children's Medical Center, Tehran University of Medical Sciences, Tehran, Iran, **4** Network of Immunity in Infection, Malignancy and Autoimmunity (NIIMA), Universal Scientific Education and Research Network (USERN), Tehran, Iran, **5** Department of Immunology, School of Medicine, Tehran University of Medical Sciences, Tehran, Iran

✉ These authors contributed equally to this work.

\* [rezaei\\_nima@yahoo.com](mailto:rezaei_nima@yahoo.com)

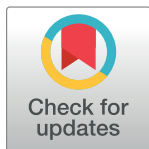

## OPEN ACCESS

**Citation:** Masroui M, Khanmohammadi S, Fallahtafti P, Rezaei N (2023) Long non-coding RNA as a potential diagnostic biomarker in head and neck squamous cell carcinoma: A systematic review and meta-analysis. PLoS ONE 18(9): e0291921. <https://doi.org/10.1371/journal.pone.0291921>

**Editor:** Simona Zaami, University of Rome La Sapienza Sapienza Faculty of Medicine and Dentistry: Università degli Studi di Roma La Sapienza Facoltà di Medicina e Odontoiatria, ITALY

**Received:** August 2, 2023

**Accepted:** September 9, 2023

**Published:** September 21, 2023

**Copyright:** © 2023 Masroui et al. This is an open access article distributed under the terms of the [Creative Commons Attribution License](https://creativecommons.org/licenses/by/4.0/), which permits unrestricted use, distribution, and reproduction in any medium, provided the original author and source are credited.

**Data Availability Statement:** All relevant data are within the paper and its [Supporting Information](#) files.

**Funding:** The author(s) received no specific funding for this work.

**Competing interests:** The authors have declared that no competing interests exist.

## Abstract

### Background

Head and neck squamous cell carcinoma (HNSCC) is a group of malignancies arising from the epithelium of the head and neck. Despite efforts in treatment, results have remained unsatisfactory, and the death rate is high. Early diagnosis of HNSCC has clinical importance due to its high rates of invasion and metastasis. This systematic review and meta-analysis evaluated the diagnostic accuracy of lncRNAs in HNSCC patients.

### Methods

PubMed, ISI, SCOPUS, and EMBASE were searched for original publications published till April 2023 using MeSH terms and free keywords “long non-coding RNA” and “head and neck squamous cell carcinoma” and their expansions. The Reitsma bivariate random effect model pooled diagnostic test performance for studies that reported specificity and sensitivity; diagnostic AUC values from all trials were meta-analyzed using the random effects model with the inverse variance method.

### Results

The initial database search yielded 3209 articles, and 25 studies met our criteria. The cumulative sensitivity and specificity for lncRNAs in the diagnosis of HNSCC were 0.74 (95%CI: 0.68–0.7) (and 0.79 (95%CI: 0.74–0.83), respectively. The pooled AUC value for all specimen types was found to be 0.83. Using the inverse variance method, 71 individual lncRNAs yielded a pooled AUC of 0.77 (95%CI: 0.74–0.79). Five studies reported on the diagnostic accuracy of the MALAT1 lncRNA with a pooled AUC value of 0.83 (95%CI: 0.73–0.94).

## Conclusions

LncRNAs could be used as diagnostic biomarkers for HNSCC, but further investigation is needed to validate clinical efficacy and elucidate mechanisms. High-throughput sequencing and bioinformatics should be used to ascertain expression profiles.

## Introduction

Head and neck squamous cell carcinoma (HNSCC) is a heterogeneous group of malignancies arising from the epithelium of the lip, oral cavity, nose, sinuses, nasopharynx, oropharynx, hypopharynx, and larynx. Based on tumor location, HNSCC is divided into different types, including tongue squamous cell carcinoma (TSCC), oral squamous cell carcinoma (OSCC), laryngeal squamous cell carcinoma (LSCC), and nasopharyngeal carcinoma (NPC) [1].

HNSCC is the sixth most common cancer globally and one of the most common causes of mortality due to cancer, accounting for 450,000 deaths worldwide in 2018 [2]. The incidence of head and neck cancers is predicted to rise to 856,000 cases annually by 2035 [3]. Despite the efforts to treat HNSCC, results have remained unsatisfactory, and the death rate is high [4]. Most cases of HNSCC are not diagnosed until regional lymph node metastases. As poor prognosis and relatively high mortality of HNSCC are primarily due to the high rates of invasion and metastasis [5], early diagnosis of HNSCC has clinical importance.

Histopathological evaluation of the tissue obtained by tumor or neck mass biopsy is currently the gold standard for diagnosing HNSCC [6]. Incisional biopsy, excisional biopsy, and fine needle aspiration (FNA) are used depending on the primary tumor [6]. However, major tissue biopsy drawbacks include false acquisition of samples due to tumor heterogeneity, patients' discomfort, and difficulty in diagnosing regional metastasis [7]. Recently, there has been a rising interest in liquid biopsies as an alternative non-invasive method for molecular characterization of HNSCC [8]. Due to their minimally invasive nature, liquid biopsies have been known as a novel approach for screening, diagnosing, and monitoring HNSCC [8].

In recent years, there has been a growing emphasis on various categories of non-coding RNAs, such as long non-coding RNAs (lncRNA), microRNAs, and circular RNAs (circRNAs), and their potential diagnostic, prognostic and therapeutic significance in various types of cancer, specially colorectal cancer [9–11], breast cancer [12, 13], endometrial cancer [14, 15], gastric cancer [16, 17], thyroid cancer [18–20], and solid tumors [21–23]. Several studies have highlighted changes in coding and non-coding RNAs in HNSCC patients, which have demonstrated the critical roles of these molecules in the pathogenesis of HNSCC [24, 25]. One of the non-coding RNA molecules involved in the pathogenesis of HNSCC is lncRNA. LncRNAs are a group of non-coding RNA molecules with at least 200 nucleotides [26]. Evidence has shown that lncRNAs play a pivotal role in various cancers, such as gastric, colon, and prostate [27]. Alterations in the expression of lncRNAs can cause changes in cellular proliferation, apoptosis, and invasion [27]. The abnormal expression of lncRNAs from tissue, serum, saliva, or urine samples is detected by using molecular methods [28].

Gibb et al. were the first to investigate the expression level of the lncRNAs in OSCC [29]. Studies have shown HOTAIR was upregulated in OSCC tissues compared to normal adjacent tissues [30, 31]. Additionally, HOTAIR was found to be overexpressed in LSCC tissues [32]. Urothelial cancer-associated 1 (UCA1), which is thought to play a role in bladder cancer progression, was significantly upregulated in TSCC and OSCC [33, 34]. Metastasis-associated lung adenocarcinoma transcript 1 (MALAT1) is another lncRNA upregulated in HNSCC,

including LSCC, TSCC, and OSCC [35, 36]. These findings suggest that lncRNAs may be suitable future diagnostic biomarkers in patients with HNSCC.

Therefore, exploring the potential of lncRNAs as diagnostic markers in patients with HNSCC may provide new insights into the disease's molecular mechanisms and potentially lead to the development of more precise and effective diagnostic approaches. The present systematic review and meta-analysis aimed to investigate the diagnostic accuracy of lncRNAs in individuals with HNSCC.

## Methods

Our systematic review and meta-analysis adhered to the guidelines outlined in the Preferred Reporting Items for Systematic Reviews and Meta-Analyses (PRISMA) Statement [37]. Our systematic review and meta-analysis protocol was registered at PROSPERO with the registration number CRD42023424362.

### Literature search

A comprehensive search was conducted in PubMed, Web of Science (ISI), Scopus, and Embase for English papers until April 1<sup>st</sup>, 2023, with no restrictions on publication year. We utilized a search query for titles, abstracts, and keywords in our chosen databases to perform a systematic search. The search query is available in [S1 Table](#).

### Selection criteria

All peer-reviewed original research that reported sensitivity, specificity, or area under the curve (AUC) values of plasma lncRNAs for diagnosing HNSCC were included.

We included original human studies conducted prospectively or retrospectively on samples obtained from cancer patients with pathological diagnoses and healthy participants. Diagnostic accuracy studies should have compared lncRNAs to an acceptable reference control to determine sensitivity and specificity regardless of test assay time. We considered the studies on tissue bank samples collected from prospectively selected groups to be eligible because they avoided omitting critical data from reporting results. The period between sample collection and laboratory testing may affect test results, which may be affected by sample storage conditions and the stability of each particular biomarker throughout storage and freeze-thawing. Most studies did not have this information readily accessible; thus, we did not examine it in our review. We did not apply eligibility restrictions based on the healthcare settings where the research was conducted and the total number of participants in the included studies.

Non-peer-reviewed and non-English studies, studies using datasets, letters, comments, reviews, case reports, and case series were deemed ineligible and excluded.

After removing duplicates, two authors (SK and MM) screened the titles and abstracts of all identified studies based on the predefined inclusion and exclusion criteria to determine eligibility. After collecting eligible studies, both authors conducted a comprehensive full-text review independently. Any conflicts that arose during the review process were resolved through consensus.

### Data collection

Two reviewers (PF, SK) independently obtained the following data using a standardized extraction: author name, publication year, study design, cancer type, specimen type, sample size, lncRNA name, control population, change in levels of lncRNA in patients compared to the control group, sensitivity, specificity, and area under the curve (AUC) and its 95%

confidence interval (CI), and p-value. The third researcher (MM) assessed the probable discrepancies between data extraction files, and any disagreements were resolved by consensus.

### Quality assessment

QUADAS-C was utilized to evaluate the quality of included observational studies [38]. The QUADAS-C tool serves as a method for assessing the potential for bias in studies that compare the accuracy of diagnostic tests. QUADAS-C works by a series of questions to each of the four domains of QUADAS-2: Patient Selection, Index Test, Reference Standard, and Flow and Timing. QUADAS-C provides a set of signaling questions for each question to help guide the answer. The answers can be “yes”, “no”, or “unclear”, depending on the information available in the study report. Based on the answers to the guideline questions, QUADAS-C provides guidance on how to assess the risk of bias for each domain as “low”, “high”, or “unclear”. The overall risk of bias for the comparison can then be assessed by considering the risk of bias for each domain.

### Statistical analysis

We used Reitsma et al.'s (2005) bivariate random effect model to pool studies reporting diagnostic specificity and sensitivity [39]. A bivariate generalized linear mixed model (GLMM) captures the test's sensitivity, specificity, correlation, and variability across studies. This model uses logit transformation to combine test sensitivity and specificity across multiple studies, taking into account their interdependence. The summary receiver operating characteristic (sROC) curve and AUC, which indicate the test's precision, were also calculated. The random effects model was used to meta-analyze diagnostic AUC values using the inverse variance method for all studies. This approach was chosen due to the anticipated heterogeneity among the included studies. The approach is capable of computing a summary AUC and its corresponding CI for the aggregated studies.

Diagnostic Odds Ratios reported by some studies were converted to diagnostic AUC using a method introduced by (Salgado, 2018) [40]. The standard error of the AUCs for use in this model was calculated from the 95% CI, if reported, or from the AUC value itself and the sample size. I<sup>2</sup> and DerSimonian-Lairdestimator for tau<sup>2</sup> statistics were used to assess study heterogeneity. To further explore the heterogeneity, a subgroup analysis was conducted based on the type of specimen obtained. The statistical analyses and visualizations were performed using R version 4.2.2. A statistically significant result was defined as having an I<sup>2</sup> value greater than 50% and a p-value less than 0.05.

## Results

### Basic characteristics

Upon conducting the primary search of the database, a total of 3209 titles were added. Following the removal of duplicates, the titles and abstracts of 1113 articles were subject to screening for inclusion, with 1043 articles subsequently being excluded. After conducting a thorough review, 63 articles were deemed suitable for full-text analysis. Twenty-five studies fulfilled the criteria for inclusion and 38 studies were excluded (S2 Table). The study selection and exclusion details are delineated by the PRISMA flowchart, as depicted in Fig 1.

Table 1 presents a summary of the basic characteristics of the included studies. The included papers were published between 2014 to 2023. The review included a sample size of 5404 HNSCC cases and 576 healthy controls sourced from various countries, including China, Turkey, Poland, Taiwan, Romania, and Iran. Forty-four diagnostic evaluations were on

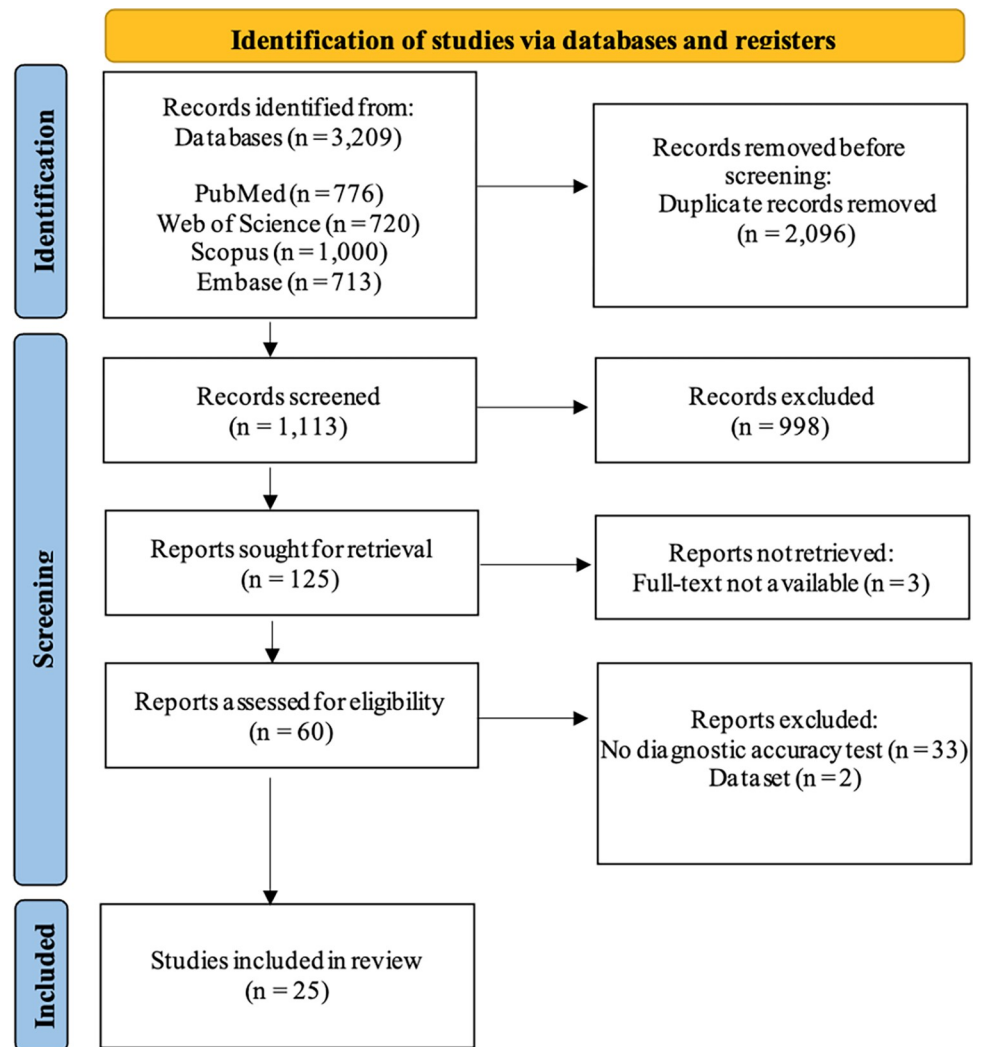

**Fig 1. Flow chart of systematic review according to Preferred Reporting Items for Systematic Reviews and Meta-Analysis (PRISMA) guideline.**

<https://doi.org/10.1371/journal.pone.0291921.g001>

HNSCC cases of different types, 21 on LSCC, one on hypopharyngeal squamous cell carcinoma (HSCC), 15 on OSCC, and one on TSCC. Three types of specimens were evaluated, including 12 tumor tissue samples, 55 blood samples, and 15 saliva samples. Out of 82 diagnostic evaluations in the included studies, a total of 71 unique lncRNAs were identified. Fifty-seven diagnostic evaluations observed the upregulation of lncRNAs, while 23 observed their downregulation. The diagnostic potential of lncRNA MALAT1 has been validated in five studies. Fifty-two diagnostic evaluations have published sensitivity and specificity metrics lncRNAs to diagnose HNSCC. Each of these 52 evaluations assessed a different type of lncRNA.

### Quality assessment

The included studies were evaluated by independent investigators using the QUADAS-C tool for quality assessment. A third assessor was responsible for resolving any discrepancies in quality evaluation. The outcomes of the quality assessment of the incorporated research are illustrated in Figs 2 and 3, which depict Cochrane's risk of bias graph and the risk of bias scores for

Table 1. Basic characteristics of the included studies.

| ID | Author, year     | Country | Study design | Specimen     | Sample size | Cancer type | Control type                             | Case N.   | Control N. | lncRNA                         | Up/down regulation | Sensitivity %        | Specificity %        | AUC                  | p value              | OR    |  |
|----|------------------|---------|--------------|--------------|-------------|-------------|------------------------------------------|-----------|------------|--------------------------------|--------------------|----------------------|----------------------|----------------------|----------------------|-------|--|
| 1  | Yao, 2018 [41]   | China   | case-control | Tumor tissue | 40          | HNSCC       | healthy controls, normal adjacent tissue | 20        | 20         | LINC00964                      | up                 |                      |                      |                      | 0.387 [0.224; 0.55]  | 0.171 |  |
|    |                  |         |              |              | Blood       |             |                                          | 200       | 100        | HOXA11-AS                      | up                 |                      |                      |                      | 0.659 [0.584; 0.735] | 0     |  |
|    |                  |         |              | 200          |             |             | 100                                      | LINC00964 | up         |                                |                    |                      | 0.687 [0.614; 0.759] | 0                    |                      |       |  |
|    |                  |         |              | 200          |             |             | 100                                      | MALAT1    | up         |                                |                    |                      | 0.718 [0.646; 0.79]  | 0                    |                      |       |  |
|    |                  |         |              | 40           |             |             | 20                                       | HOXA11-AS | up         |                                |                    |                      | 0.773 [0.64; 0.905]  | 0.001                |                      |       |  |
|    |                  |         |              | 40           | 20          |             | MALAT1                                   | up        |            |                                |                    | 0.918 [0.838; 0.999] | 0                    |                      |                      |       |  |
| 2  | Wu, 2018 [42]    | China   | case-control | Blood        | 1098        | HNSCC       | serum, healthy controls                  | 366       | 732        | rs7958904                      | down               |                      |                      | 0.478 [0.72; 1.04]   | 0.132                | 0.87  |  |
|    |                  |         |              |              |             |             |                                          | 366       | 732        | rs874945                       |                    |                      |                      | 0.48 [0.72; 1.09]    | 0.241                | 0.88  |  |
| 3  | Akian, 2022 [43] | Turkey  | case-control | Saliva       | 60          | LSCC        | saliva (healthy controls)                | 35        | 25         | HOTAIR, rs4759314 polymorphism | up                 | 28.57                | 92                   | 0.53 [1.01; 1.46]    | 0.043                | 1.21  |  |
|    |                  |         |              |              |             |             |                                          | 35        | 25         | LINC02015                      | down               | 28.57                | 92                   | 0.502 [0.353; 0.651] | 0.982                |       |  |
|    |                  |         |              |              |             |             |                                          | 35        | 25         | LINC02584                      | down               | 28.57                | 92                   | 0.502 [0.353; 0.651] | 0.982                |       |  |
|    |                  |         |              |              |             |             |                                          | 35        | 25         | TPRG1-AS2                      | down               | 88.57                | 28                   | 0.517 [0.359; 0.674] | 0.837                |       |  |
|    |                  |         |              |              |             |             |                                          | 35        | 25         | LINC00501                      | down               | 45.71                | 68                   | 0.522 [0.37; 0.674]  | 0.774                |       |  |
|    |                  |         |              |              |             |             |                                          | 35        | 25         | LINC00578                      | down               | 37.14                | 84                   | 0.526 [0.377; 0.675] | 0.735                |       |  |
|    |                  |         |              |              |             |             |                                          | 35        | 25         | SHANK2-AS3                     | down               | 42.86                | 76                   | 0.535 [0.386; 0.684] | 0.647                |       |  |
|    |                  |         |              |              |             |             |                                          | 35        | 25         | PEX5L-AS2                      | down               | 65.71                | 65                   | 0.584 [0.432; 0.736] | 0.28                 |       |  |
|    |                  |         |              |              |             |             |                                          | 35        | 25         | SHANK2-AS1                     | up                 | 91.43                | 36                   | 0.616 [0.462; 0.77]  | 0.139                |       |  |
|    |                  |         |              |              |             |             |                                          | 35        | 25         | SOX2-OT                        | down               | 51.43                | 76                   | 0.617 [0.47; 0.765]  | 0.12                 |       |  |
|    |                  |         |              |              |             |             |                                          | 35        | 25         | ABCC5-AS1                      | down               | 48.57                | 84                   | 0.65 [0.511; 0.79]   | 0.035                |       |  |
|    |                  |         |              |              |             |             |                                          | 35        | 25         | LINC01209                      | down               | 77.14                | 60                   | 0.665 [0.52; 0.81]   | 0.026                |       |  |
|    |                  |         |              |              |             |             |                                          | 35        | 25         | LINC01206                      | down               | 51.43                | 88                   | 0.702 [0.57; 0.833]  | 0.003                |       |  |
|    |                  |         |              |              |             |             |                                          | 35        | 25         | LINC01994                      | down               | 82.86                | 76                   | 0.803 [0.688; 0.919] | <0.001               |       |  |

(Continued)

Table 1. (Continued)

| ID | Author, year        | Country | Study design | Specimen     | Sample size | Cancer type | Control type            | Case N. | Control N. | lncRNA           | Up/down regulation | Sensitivity % | Specificity % | AUC                     | p value  | OR |
|----|---------------------|---------|--------------|--------------|-------------|-------------|-------------------------|---------|------------|------------------|--------------------|---------------|---------------|-------------------------|----------|----|
| 4  | Lasinska, 2020 [44] | Poland  | case-control | Blood        | 67          | HNSCC       | serum, healthy controls | 53      | 14         | EVF1 & EVF2      | up                 | 50            | 100           | 0.577                   | 0.024    |    |
|    |                     |         |              |              |             |             |                         | 53      | 14         | WTL-AS           | up                 | 57.5          | 71.4          | 0.593                   | 0.049    |    |
|    |                     |         |              |              |             |             |                         | 53      | 14         | masRNA           | up                 | 46.2          | 100           | 0.632                   | 0.0045   |    |
|    |                     |         |              |              |             |             |                         | 53      | 14         | HOXA6as          | up                 | 80.8          | 71.4          | 0.637                   | 0.0069   |    |
|    |                     |         |              |              |             |             |                         | 53      | 14         | TncRNA           | up                 | 34.6          | 100           | 0.643                   | 0.01     |    |
|    |                     |         |              |              |             |             |                         | 53      | 14         | SNHG4            | up                 | 38.5          | 100           | 0.659                   | 0.017    |    |
|    |                     |         |              |              |             |             |                         | 53      | 14         | Emx2os           | up                 | 88.5          | 57.1          | 0.703                   | 0.034    |    |
|    |                     |         |              |              |             |             |                         | 53      | 14         | Kcnq1ot1         | up                 | 69.2          | 85.7          | 0.714                   | 0.0062   |    |
|    |                     |         |              |              |             |             |                         | 53      | 14         | E2F4 antisense   | up                 | 80.8          | 71.4          | 0.758                   | 0.0095   |    |
|    |                     |         |              |              |             |             |                         | 53      | 14         | RNCR3            | up                 | 88.5          | 57.1          | 0.758                   | 0.00079  |    |
|    |                     |         |              |              |             |             |                         | 53      | 14         | Jpx              | up                 | 96.2          | 57.1          | 0.769                   | 0.0031   |    |
|    |                     |         |              |              |             |             |                         | 53      | 14         | MER11C           | up                 | 53.8          | 100           | 0.769                   | 0.0007   |    |
|    |                     |         |              |              |             |             |                         | 53      | 14         | Dios3os          | up                 | 76.9          | 85.7          | 0.786                   | 0.008    |    |
|    |                     |         |              |              |             |             |                         | 53      | 14         | H19              | up                 | 80.8          | 85.7          | 0.797                   | 0.0018   |    |
|    |                     |         |              |              |             |             |                         | 53      | 14         | YRNA1            | up                 | 80.8          | 71.4          | 0.797                   | 0.003    |    |
|    |                     |         |              |              |             |             |                         | 53      | 14         | SRA              | up                 | 88.5          | 71.4          | 0.808                   | 0.007    |    |
|    |                     |         |              |              |             |             |                         | 53      | 14         | TEA ncRNAs       | up                 | 61.5          | 100           | 0.808                   | 0.033    |    |
|    |                     |         |              |              |             |             |                         | 53      | 14         | SCA8             | up                 | 80.8          | 85.7          | 0.819                   | 0.0004   |    |
|    |                     |         |              |              |             |             |                         | 53      | 14         | ST7OT            | up                 | 84.6          | 71.4          | 0.841                   | 0.003    |    |
|    |                     |         |              |              |             |             |                         | 53      | 14         | 21A              | up                 | 76.9          | 85.7          | 0.846                   | 0.0014   |    |
|    |                     |         |              |              |             |             |                         | 53      | 14         | Air              | up                 | 61.5          | 100           | 0.863                   | 0.000014 |    |
|    |                     |         |              |              |             |             |                         | 53      | 14         | BACE1AS          | up                 | 73.1          | 100           | 0.865                   | 0.001    |    |
|    |                     |         |              |              |             |             |                         | 53      | 14         | Alpha 280        | up                 | 88.5          | 85.7          | 0.874                   | 0.00066  |    |
|    |                     |         |              |              |             |             |                         | 53      | 14         | UCA1             | up                 | 88.5          | 85.7          | 0.879                   | 0.01     |    |
|    |                     |         |              |              |             |             |                         | 53      | 14         | Zfas1            | up                 | 100           | 71.4          | 0.879                   | 0.001    |    |
|    |                     |         |              |              |             |             |                         | 53      | 14         | NRON             | up                 | 100           | 71.4          | 0.885                   | 0.00008  |    |
|    |                     |         |              |              |             |             |                         | 53      | 14         | SNHG6            | up                 | 73.1          | 100           | 0.885                   | 0.002    |    |
|    |                     |         |              |              |             |             |                         | 53      | 14         | SNHG3            | up                 | 88.5          | 85.7          | 0.89                    | 0.00002  |    |
|    |                     |         |              |              |             |             |                         | 53      | 14         | ncR-uPAR         | up                 | 80.8          | 85.7          | 0.896                   | 0.0001   |    |
|    |                     |         |              |              |             |             |                         | 53      | 14         | p53 mRNA         | up                 | 73.1          | 100           | 0.901                   | 0.0068   |    |
|    |                     |         |              |              |             |             |                         | 53      | 14         | GAS5             | up                 | 76.9          | 100           | 0.918                   | 0.00001  |    |
|    |                     |         |              |              |             |             |                         | 53      | 14         | SNHG1            | up                 | 76.9          | 100           | 0.934                   | 0.0017   |    |
|    |                     |         |              |              |             |             |                         | 53      | 14         | ANRIL            | up                 | 100           | 100           | 1                       | 0.0018   |    |
|    |                     |         |              |              |             |             |                         | 53      | 14         | lincRNA-RoR      | up                 | 100           | 100           | 1                       | 0.00025  |    |
| 5  | Shen, 2014 [45]     | China   | case-control | Tumor tissue | 87          | LSCC        | normal adjacent tissue  | 87      | -          | AC026166.2-001   | down               |               |               | 0.65                    | <0.001   |    |
|    |                     |         |              |              |             |             |                         | 87      | -          | RP11-169D4.1-001 | down               |               |               | 0.67                    |          |    |
| 6  | Shen, 2019 [46]     | China   | case-control | Tumor tissue | 70          | HSCC        | normal adjacent tissue  | 70      | -          | RP11-169D4.1-001 | down               | 54            | 70            | 0.66 [0.568; 0.749]     | <0.05    |    |
| 7  | Bogeyik, 2022 [47]  | Turkey  | case-control | Tumor tissue | 36          | OSCC        | adjacent normal tissue  | 36      | -          | VIM-AS1          | up                 | 63            | 66.67         | 0.6857 [0.5577; 0.8137] | 0.0085   |    |
| 8  | Wang, 2014 [48]     | China   | case-control | Blood        | 101         | LSCC        | vocal cord polyps       | 52      | 49         | HOTAIR           | up                 | 92.3          | 57.1          | 0.727 [0.629; 0.811]    | <0.000   |    |

(Continued)

Table 1. (Continued)

| ID | Author, year             | Country | Study design    | Specimen     | Sample size | Cancer type | Control type                                 | Case N. | Control N. | lncRNA     | Up/down regulation | Sensitivity % | Specificity % | AUC                     | p value | OR     |
|----|--------------------------|---------|-----------------|--------------|-------------|-------------|----------------------------------------------|---------|------------|------------|--------------------|---------------|---------------|-------------------------|---------|--------|
| 9  | Shieh, 2021 [49]         | Taiwan  | cross-sectional | Saliva       | 102         | OSCC        | individuals without OSCC                     | 59      | 43         | XIST       | down               |               |               | 0.73                    | <0.001  | 19.556 |
|    |                          |         |                 |              | 53          |             | females without OSCC                         | 26      | 27         | XIST       | down               |               |               | 0.915                   | <0.001  | 33.733 |
| 10 | Aghorghiesei, 2022 [50]  | Romania | cohort          | Tumor tissue | 33          | OSCC        | adjacent normal tissue                       | 33      | -          | H19        | down               |               |               | 0.746                   | <0.001  |        |
|    |                          |         |                 |              | 130         | OSCC        | serum, healthy controls                      | 90      | 40         | MALAT1     | down               |               |               | 0.7984                  | <0.01   |        |
| 11 | Zheng, 2020 [51]         | China   | cohort          | Blood        | 43          | LSCC        | serum, healthy controls                      | 22      | 21         | SAMMSON    | up                 |               |               | 0.746                   | <0.001  |        |
| 12 | Giragosyan, 2018 [52]    | China   | case-control    | Blood        | 105         | LSCC        | serum, healthy controls                      | 105     | -          | MALAT1     | up                 |               |               | 0.753 [0.601; 0.905]    | 0.004   |        |
| 13 | Liu, 2020 [53]           | China   | Cohort          | Tumor tissue | 106         | LSCC        | normal adjacent tissue                       | 105     | -          | LINC01194  | up                 |               |               | 0.8388 [0.7839; 0.8937] | <       |        |
|    |                          |         |                 |              | 174         | OSCC        | normal oral mucosal tissue, healthy controls | 80      | 26         | LINC01793  | up                 | 76.51         | 83.69         | 0.84 [0.75; 0.93]       | <0.001  |        |
| 14 | Yuan, 2021 [54]          | China   | case-control    | Blood        | 120         | OSCC        | serum, healthy controls                      | 122     | 52         | CASC2      | down               |               |               | 0.8445 [0.7728; 0.9162] | <0.05   |        |
| 15 | Dong, 2018 [55]          | China   | case-control    | Blood        | 150         | OSCC        | serum, healthy controls                      | 68      | 52         | PAPAS      | up                 |               |               | 0.85 [0.77; 0.94]       |         |        |
| 16 | Zhang, 2019 [56]         | China   | case-control    | Blood        | 110         | OSCC        | serum, healthy controls                      | 80      | 70         | AC007271.3 | up                 | 77.5          | 84.5          | 0.873 [0.815; 0.931]    |         |        |
| 17 | Shaoh, 2018 [57]         | China   | case-control    | Blood        | 55          | OSCC        | serum, healthy controls                      | 62      | 48         | NEF        | down               |               |               | 0.8782 [0.8064; 0.95]   | <0.0001 |        |
| 18 | Cui, 2019 [58]           | China   | case-control    | Blood        | 104         | LSCC        | serum, healthy controls                      | -       | 55         | NCKL_AS1   | up                 |               |               | 0.88 [0.83; 0.94]       |         |        |
| 19 | Le, 2020 [59]            | China   | case-control    | Blood        | 86          | OSCC        | serum, healthy controls                      | 55      | 49         | NCKL_AS1   | up                 |               |               | 0.93 [0.88; 0.97]       |         |        |
| 20 | Zhang, 2019 [60]         | China   | case-control    | Blood        | 86          | OSCC        | serum, healthy controls                      | 46      | 40         | CASC15     | up                 |               |               | 0.88 [0.85; 0.95]       |         |        |
|    |                          |         |                 |              | 94          | LSCC        | oral ulcer                                   | 46      | 40         | CASC15     | up                 |               |               | 0.91 [0.86; 0.96]       |         |        |
| 21 | Gao, 2019 [61]           | China   | case-control    | Tumor tissue | 180         | LSCC        | Laryngeal biopsies                           | 66      | 28         | Loc285194  | down               |               |               | 0.881 [0.8124; 0.9405]  | <0.0001 |        |
| 22 | Sun, 2019 [62]           | China   | case-control    | Blood        | 50          | LSCC        | serum, healthy controls                      | 90      | 90         | UCA1       | up                 |               |               | 0.8905 [0.8408; 0.9402] | <0.0001 |        |
| 23 | Pirhousharian, 2021 [63] | Iran    | case-control    | Tumor tissue | 97          | HNSCC       | normal adjacent tissue                       | 50      | -          | Fer1L4     | down               |               |               | 0.9252                  | <0.0001 |        |
| 24 | Yuan, 2019 [64]          | China   | case-control    | Blood        | 228         | TSCC        | serum, healthy controls                      | 72      | 25         | MALAT1     | up                 |               |               | 0.9514 [0.9111; 0.9917] | <0.0001 |        |
| 25 | Wang, 2020 [65]          | China   | case-control    | Tumor tissue |             | OSCC        | nontumoral tissue                            | 152     | 76         | SNHG1      | up                 |               |               | 0.974                   | <0.05   |        |

<https://doi.org/10.1371/journal.pone.0291921.t001>



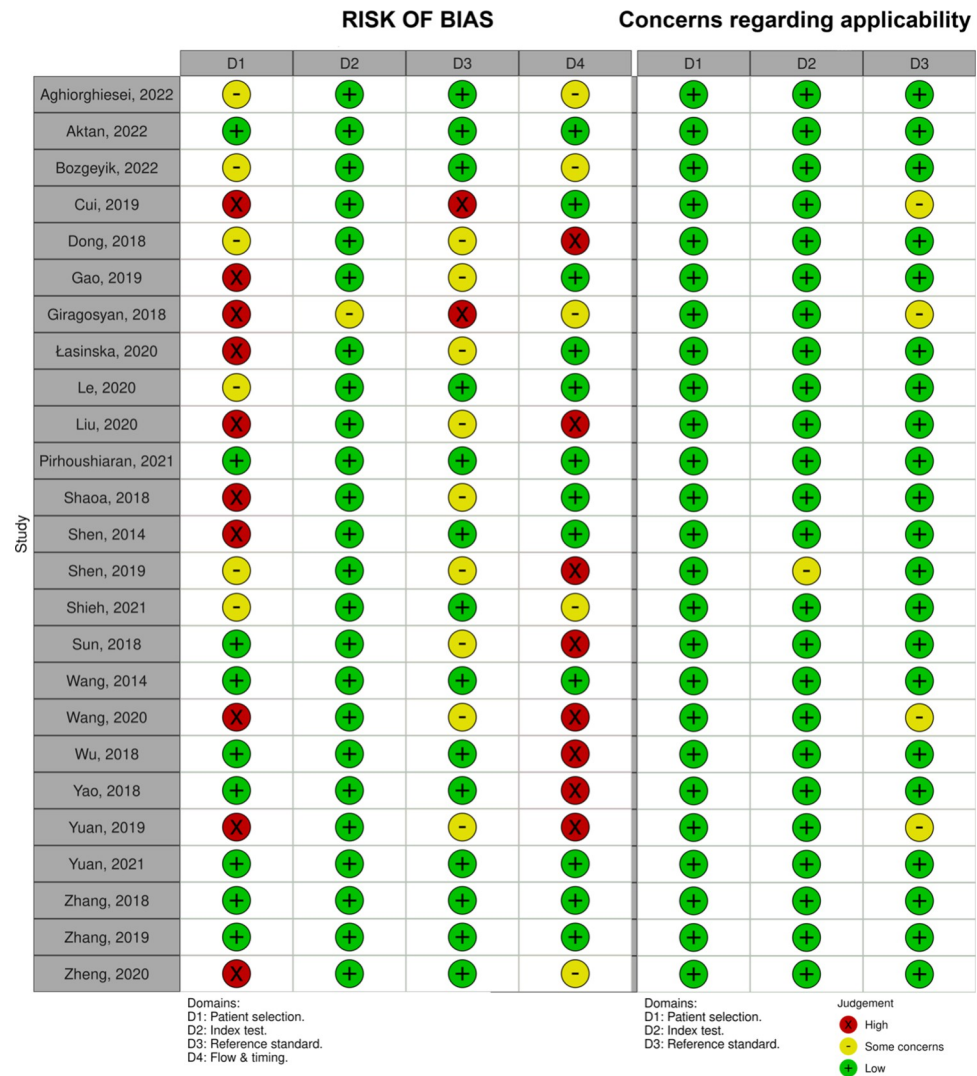

Fig 2. Cochrane’s risk of bias graph for the QUADAS-C tool.

<https://doi.org/10.1371/journal.pone.0291921.g002>

each included study, respectively. In 96% of studies, there was a low-risk of bias in the index test domain. In the reference standard and flow & time domains, 56% and 48% of studies, respectively, had a low-risk score, whereas only 36% of studies in the patient selection domain had a low-risk score. Concerns regarding applicability were rated as low risk in all domains across studies.

### Meta-analysis of diagnostic accuracy of lncRNAs in HNSCC

The cumulative sensitivity estimated by the Reitsma bivarient model for lncRNAs in the diagnosis of HNSCC was 0.74 (95% CI: 0.68–0.79, p-value = 0.000), and the pooled specificity estimate was 0.79 (95% CI: 0.74–0.83, p-value = 0.000, Fig 4). I2 estimate was 56–66.7%, based on the Holling sample size unadjusted approach. The SROC curve was plotted for each specimen type, and pooled AUC for all types of specimens was found to be 0.83 (Fig 5). As the findings for each subgroup are provided in Table 2, sensitivity, specificity, and AUC for the blood were

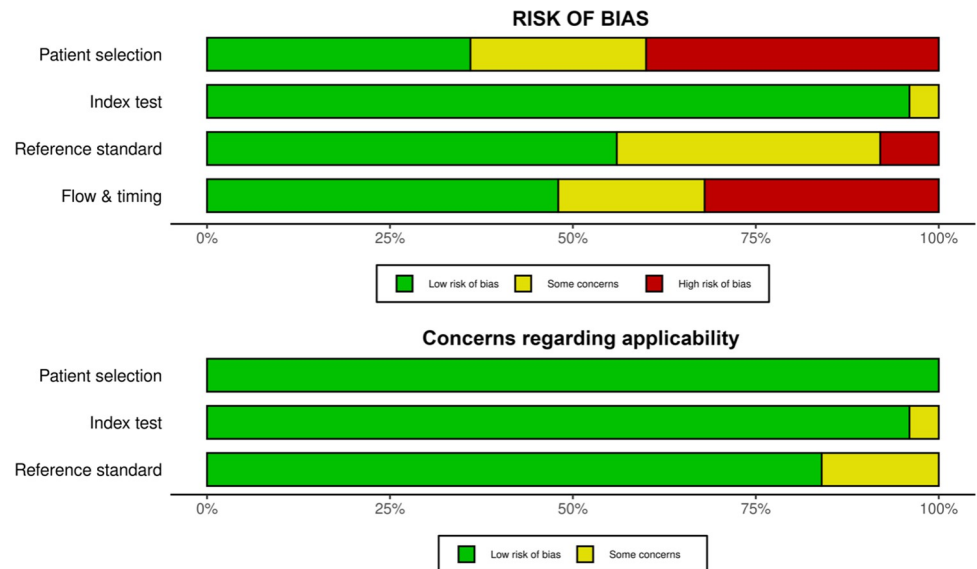

**Fig 3. Cochrane's risk of bias scores for the QUADAS-C tool.**

<https://doi.org/10.1371/journal.pone.0291921.g003>

0.787, 0.818, and 0.871, respectively. Sensitivity, specificity, and AUC for the saliva, were 0.586, 0.730, and 0.712, respectively; and for tumor tissue were 0.652, 0.676, and 0.698, respectively.

All studies incorporated in the analysis provided AUC values of lncRNAs for detecting HNSCC. The pooled AUC value was 0.77 (95% CI: 0.74–0.79,  $p$ -value = 0;  $I^2$  = 89.0%,  $p$ -value < 0.0001), calculated using the inverse variance method and derived from 82 diagnostic accuracy evaluations and 71 individual lncRNAs (Fig 6). The studies were categorized into different subgroups based on the type of specimen used to measure the expression of lncRNA. The pooled AUC for the blood specimen subgroup, saliva subgroup, and tumor tissue subgroup were 0.8045, 0.6322, and 0.7647, respectively. The findings for each subgroup are provided in Table 3. The test for between subgroup differences was statistically significant ( $Q$  = 16.58,  $p$ -value = 0.0003).

Five studies have reported on the diagnostic accuracy of lncRNA MALAT1. Given that the aforementioned studies solely provided AUC values, the inverse variance method was used to calculate the pooled AUC value of these five studies, which was 0.83 (95% CI [0.73; 0.94],  $p$ -value 0.0001,  $I^2$  = 89.1%, Fig 7).

## Publication bias

Fig 8 depicts the funnel plot of the included studies in the meta-analysis, which corresponds to the standard error of the AUCs. The asymmetrical funnel plot can indicate the presence of publication bias. Hence, statistical tests, including Begg's rank correlation test and Egger's linear regression test, were used to assess potential asymmetry in the funnel plot. According to the findings of the analysis, the studies included showed significant indications of publication bias (Begg's test  $p$ -values < 0.0001 and Eggers' test  $p$ -values < 0.0001).

## Discussion

The present systematic review and meta-analysis evaluated the diagnostic accuracy of lncRNAs in patients with HNSCC. Our study showed that levels of lncRNA in the plasma and tissues of patients with HNSCC could be used as a diagnostic biomarker. We identified 71 unique

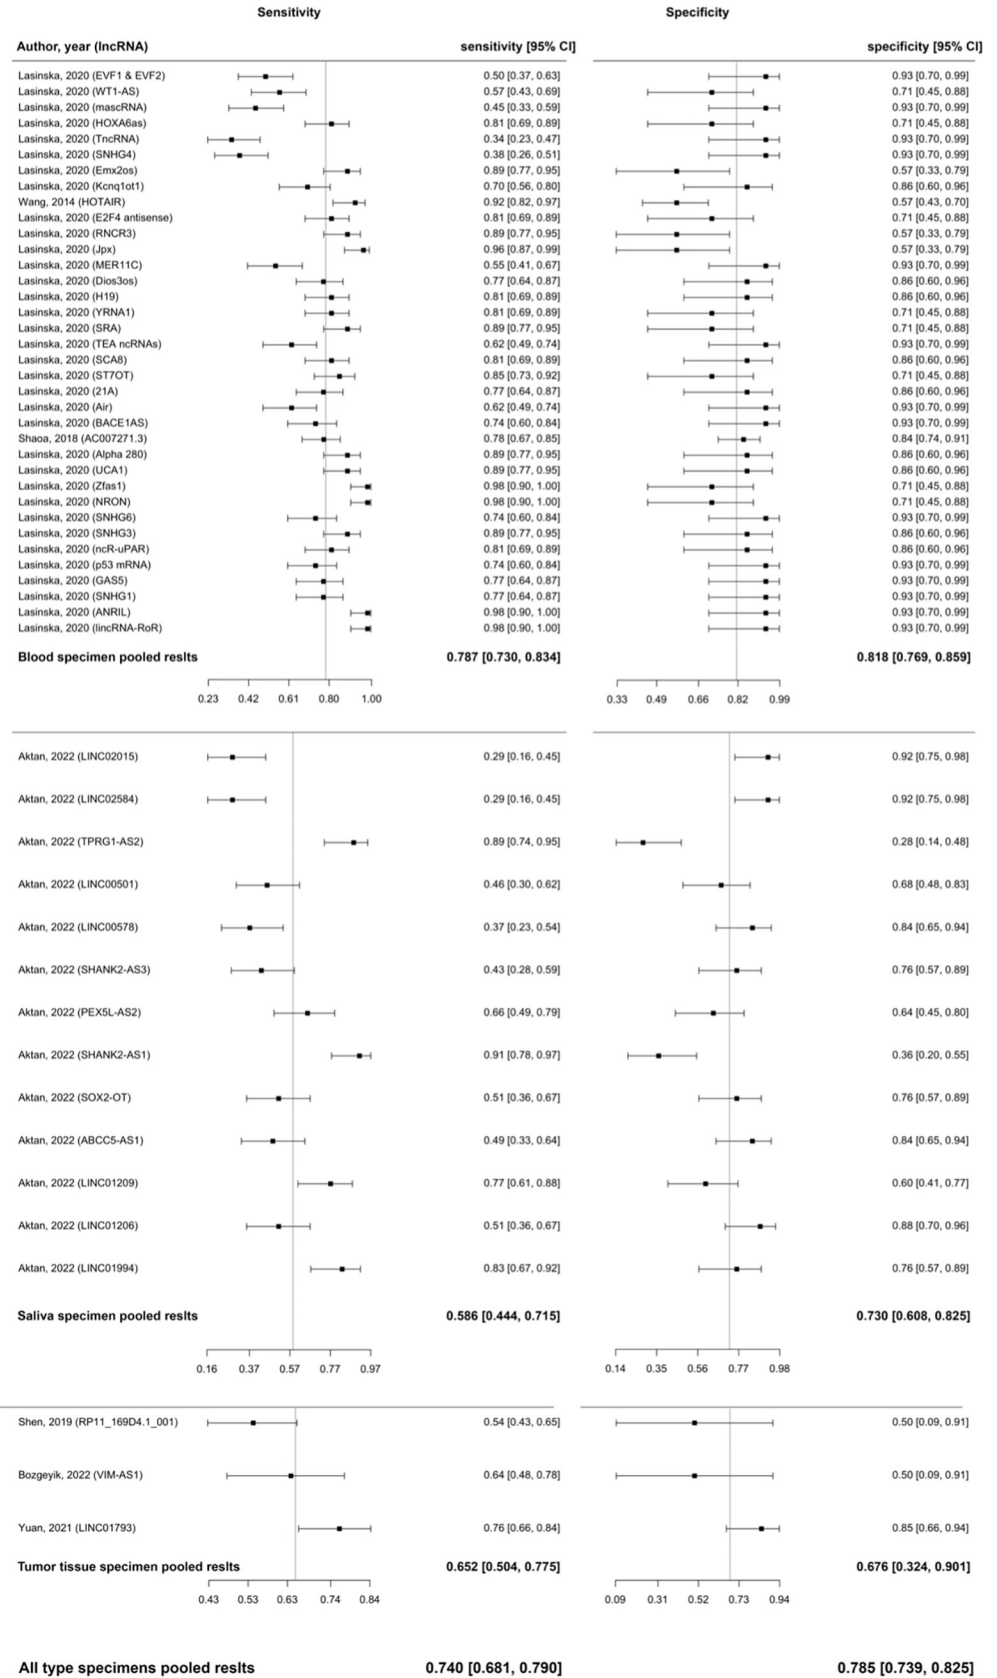

Fig 4. Forest plot for the bivariate model of diagnostic meta-analysis of subgroups.

<https://doi.org/10.1371/journal.pone.0291921.g004>

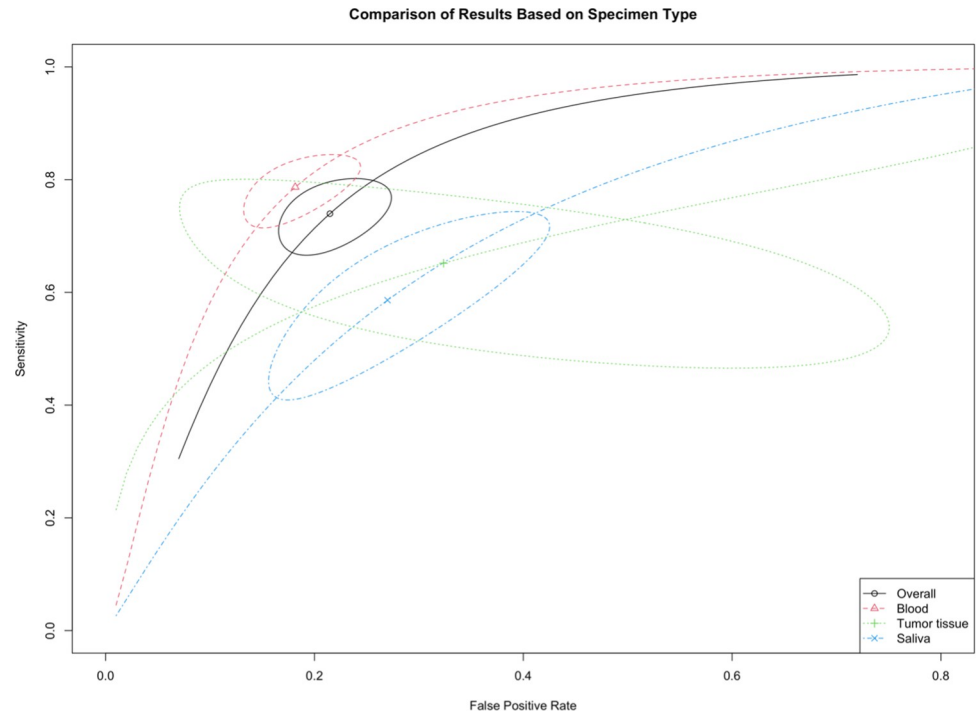

**Fig 5. Summary Receiver Operating Characteristic (SROC) curves of subgroups and overall analysis for bivariate model.**

<https://doi.org/10.1371/journal.pone.0291921.g005>

lncRNAs that were differentially expressed in HNSCC patients compared to healthy controls. The most frequently validated lncRNA was MALAT1, upregulated in five studies with a pooled AUC of 0.83. In 52 diagnostic evaluations, the pooled sensitivity and specificity of lncRNAs for diagnosing HNSCC were 0.74 and 0.79, respectively, with a pooled AUC of 0.83 across all specimen types. The specimen type significantly impacted the diagnostic accuracy of lncRNAs, with blood having the highest AUC of 0.871 and the tumor tissue having the lowest AUC of 0.698. Eighty-two diagnostic accuracy evaluations and 71 lncRNAs yielded a pooled AUC of 0.77. The AUCs for blood and tumor tissue subgroups were 0.8045 and 0.7647, respectively.

**Table 2. Bivariate model for diagnostic meta-analysis, estimation method: REML.**

| Specimen     | N  | Sensitivity [95% CI] | p-value  | Specificity [95% CI] | p-value  | AUC   | I2 Holling sample size unadjusted approach | X-squared p-value for equality of sensitivities | X-squared p-value for equality of specificities | Correlation of sensitivities and false positive rates |
|--------------|----|----------------------|----------|----------------------|----------|-------|--------------------------------------------|-------------------------------------------------|-------------------------------------------------|-------------------------------------------------------|
| Blood        | 36 | 0.787 [0.730, 0.834] | 0.000*** | 0.818 [0.769, 0.859] | 0.000*** | 0.871 | 39.2–48.6%                                 | <2e-16***                                       | 0.00193**                                       | 0.506                                                 |
| Saliva       | 13 | 0.586 [0.444, 0.715] | 0.234    | 0.730 [0.608, 0.825] | 0.000*** | 0.712 | 5–6.1%                                     | 1.18e-12***                                     | 3.7e-08***                                      | 0.837                                                 |
| Tumor tissue | 3  | 0.652 [0.504, 0.775] | 0.045*   | 0.676 [0.324, 0.901] | 0.327    | 0.698 | 47.2–70.9%                                 | 0.018*                                          | 0.273                                           | NA due to small number of studies                     |

Significance codes

0 \*\*\*\*

< 0.01 \*\*\*

< 0.05 \*\*

0.1 † ; N = number of evaluations, AUC = Area Under the Curves

<https://doi.org/10.1371/journal.pone.0291921.t002>

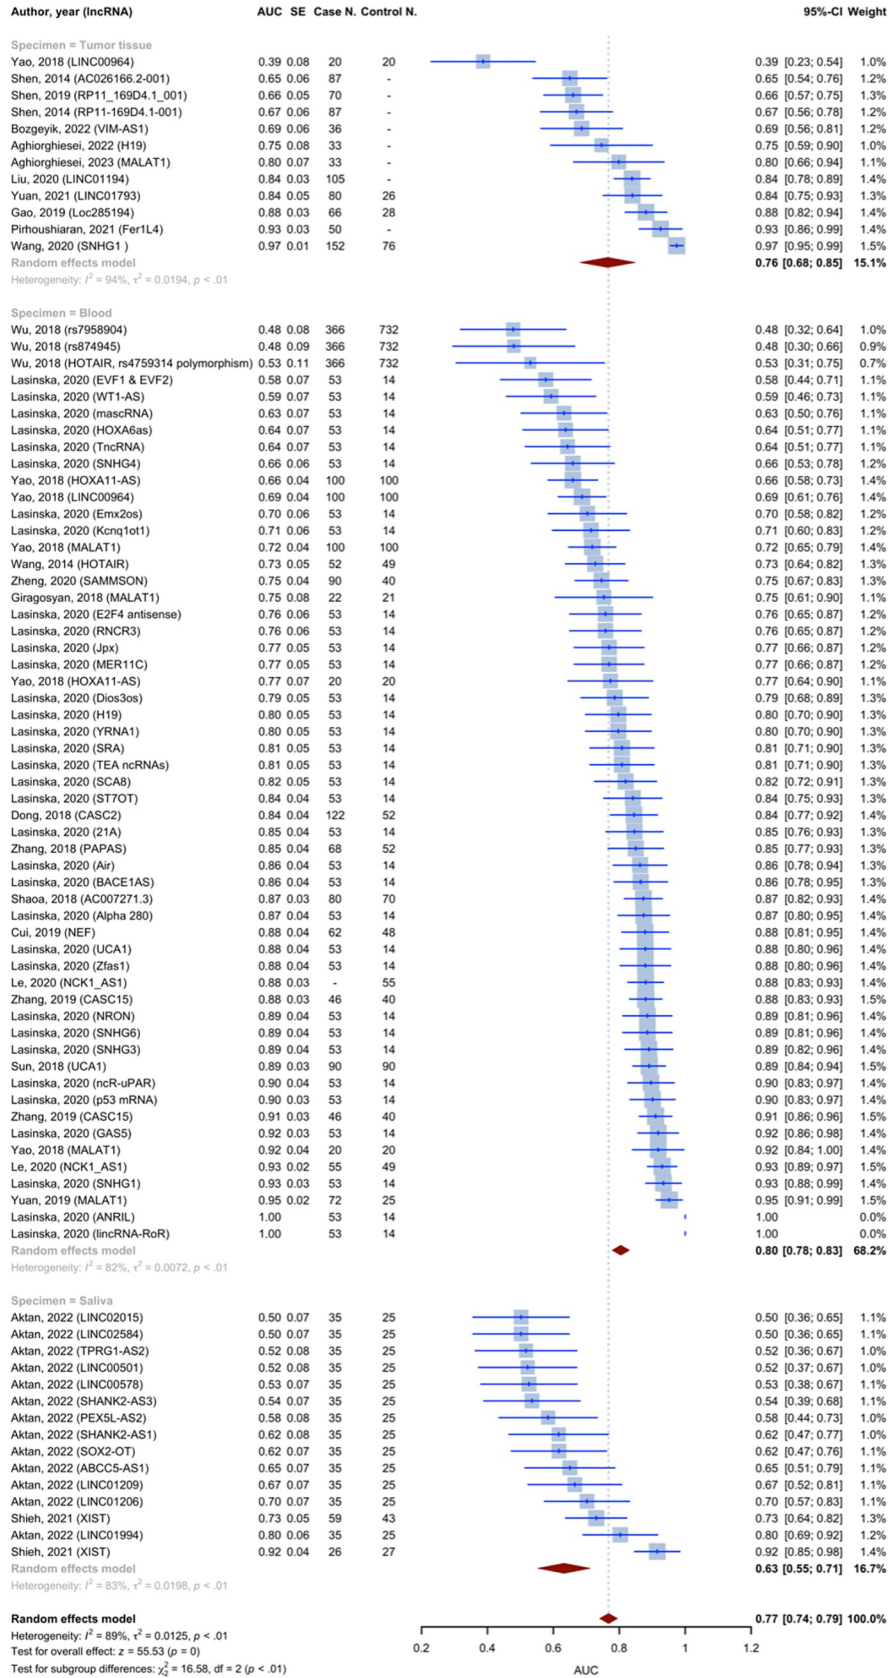

**Fig 6. Forest plot for Area Under the Curves (AUCs) of included studies using random effect model with inverse method.**

<https://doi.org/10.1371/journal.pone.0291921.g006>

LncRNAs are RNA transcripts that exceed 200 nucleotides and do not encode proteins or peptides. They regulate gene expression and function at the transcriptional, translational, and post-translational levels, thereby exerting diverse biological functions. In the past decade, it has become evident that dysregulated lncRNA profiles are involved in the pathogenesis of numerous diseases, including cancer. Specifically, lncRNAs play a critical role in tumor growth and metastasis and have been identified as potential biomarkers and targets for cancer diagnosis and treatment [66].

Despite continuous research to develop novel treatments and improve knowledge of the mechanisms driving tumor formation, treating cancers, especially those diagnosed in later stages with a dismal prognosis, remains challenging. The substantial fatality rate linked to cancer is partly attributed to inadequate early detection techniques and/or imprecise diagnostic tools, including certain protein biomarkers. As lncRNAs have high stability in the bloodstream and are resistant to nuclease-mediated degradation, they are considered more reliable than other circulating nucleic acids. Their abundance and stability in circulation make them promising cancer biomarkers compared to other analytes, such as circulating tumor cells, cell-free nucleic acids (including ctDNA), and exosomes. Although the diagnostic performance of individual circulating lncRNAs is relatively poor, to improve their specificity and sensitivity, several studies have combined the diagnostic values of multiple circulating lncRNAs [67].

With a growing interest in exploring the function of lncRNAs in different types of cancers, researchers have discovered various lncRNAs that are differentially expressed in HNSCC cell lines. LncRNAs, such as CASC9 [68], FTH1P3 [69], ZFAS1 [70], LINC01929 [71], MEG3 [72], HCG18 [73], etc., were found to be dysregulated in HNSCC cell lines. Moreover, bioinformatics analysis showed that lncRNAs are differentially expressed in patients with HNSCC, and their expression levels could be associated with disease stage, survival, and drug resistance [74].

LncRNAs could also be used as prognostic and response to therapy biomarkers in patients with HNSCC. Mutations or dysregulated expression of lncRNAs like POP1-1 [75], EGFR-AS1 [76], GAS5 [77], BARX1-DT, KLHL7-DT, and LINC02154 [78], seem to be associated with response to different types of therapies, such as chemotherapy, chemoradiotherapy, and immunotherapy in patients with HNSCC. Ferroptosis-associated lncRNAs [79], MALAT1, HOTAIR, HOTTIP, LINC02487, LINC00511 [80], PHACTR2-AS1 [81], and CEBPA-AS1 [82] are examples of lncRNAs associated with poor prognosis in patients with HNSCC. Additionally, using more than one type of lncRNAs as a signature for the prognosis prediction could increase their accuracy as a biomarker [83].

LncRNAs have been discovered to have an important role in controlling several aspects of HNSCC pathogenesis, including but not limited to proliferation, survival, metastasis,

**Table 3. Subgroup analysis of the AUS meta-analysis of included studies.**

| Specimen     | N  | AUC [95%-CI]            | I <sup>2</sup> |
|--------------|----|-------------------------|----------------|
| Blood        | 53 | 0.8045 [0.7783; 0.8306] | 82.0%          |
| Saliva       | 15 | 0.6322 [0.5529; 0.7116] | 82.8%          |
| Tumor tissue | 12 | 0.7647 [0.6805; 0.8489] | 94.0%          |

N = number of evaluations, AUC = Area Under the Curves

<https://doi.org/10.1371/journal.pone.0291921.t003>

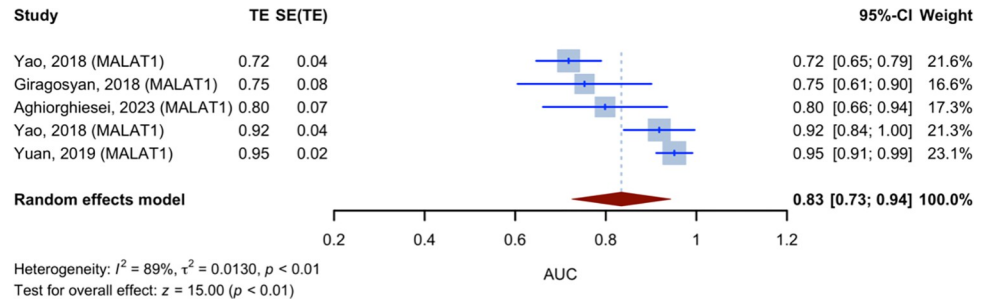

**Fig 7. Forest plot for Area Under the Curves (AUCs) of studies evaluated MALAT1 lncRNA using random effect model with inverse method.**

<https://doi.org/10.1371/journal.pone.0291921.g007>

treatment resistance, immunological response, and angiogenesis [8, 84]. Modulation of many signaling pathways in HNSCC has been found to be related to lncRNAs, including but not limited to Wnt/ $\beta$ -catenin, PI3K/AKT/mTOR, JAK/STAT3, p53, NF- $\kappa$ B, TGF- $\beta$ /Smad, and Notch [85–88]. Moreover, there is evidence suggesting that the pairing of lncRNAs with messenger RNAs (mRNAs) is associated with various biological processes, including regulation of transcription, macromolecule synthesis, immunological cells synapse development, and immunological signaling pathways such as B and T cell signaling and the signaling involving TGF- $\beta$  receptor [8]. According to one study, increased levels of LINC00460 were connected with cancer-related molecular pathways such as EMT and other inflammatory response pathways [89]. LncRNAs can interact with DNA, RNA, or proteins to influence gene expression at either the transcriptional or post-transcriptional levels. LncRNAs have been shown to act as decoys, scaffolding, guides, or sponges for their targets [8, 84]. LncRNAs can form complex networks with other lncRNAs or microRNAs, influencing the course of HNSCC. LncRNAs are subject to a variety of influences, including but not limited to hypoxia, oxidative stress, copper metabolism,

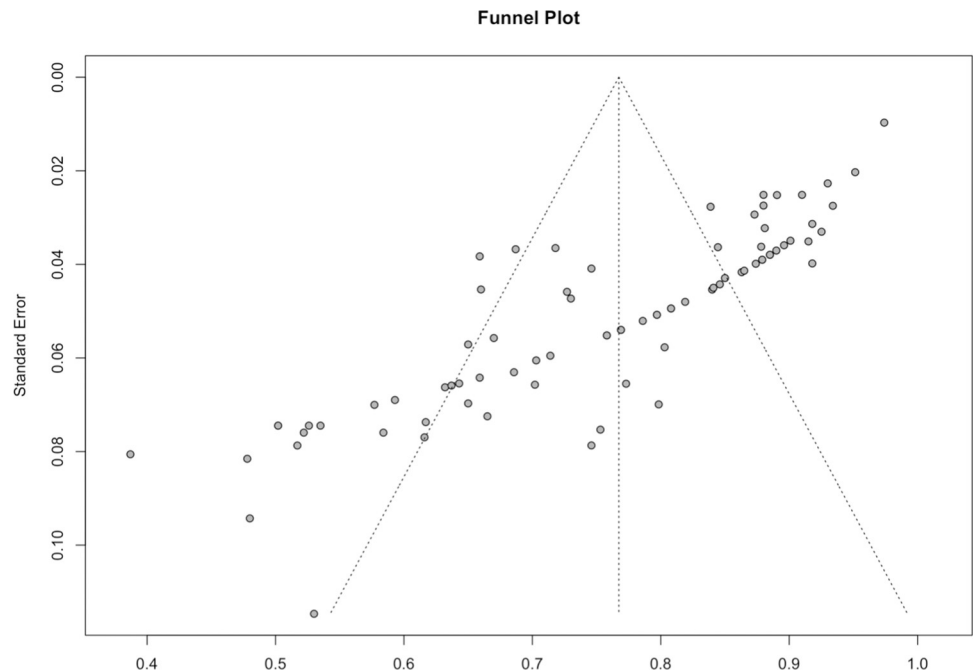

**Fig 8. Funnel plot of included studies.**

<https://doi.org/10.1371/journal.pone.0291921.g008>

and HPV infection, all of which have the potential to modulate their expression and functional roles in HNSCC [84].

MALAT1 is a lncRNA involved in various biological processes and can influence the onset and progression of several malignant cancers, including HNSCC. MALAT1 has the potential to influence HNSCC cell proliferation, migration, invasion, apoptosis, angiogenesis, drug resistance, and immunological response by mechanisms including transcriptional control, epigenetic alteration, microRNA sponge, RNA binding protein interaction, and chromatin remodeling [35, 90, 91]. MALAT1 expression in HNSCC tissues and cells is frequently dysregulated, and its level can be affected by variables such as HPV infection, smoking, alcohol intake, and hypoxia. MALAT1 has the potential to be a therapeutic target for HNSCC therapy. Several studies have found that suppressing or silencing MALAT1 can limit HNSCC growth and metastasis while also increasing HNSCC cell susceptibility to radiation and chemotherapy. However, the precise role and mechanism of MALAT1 in HNSCC are still unknown, and additional study is required to understand its function and clinical importance in HNSCC [90, 92].

lncRNAs have different expression patterns that are particular to the individual's tissue and condition, making them attractive candidates for use as biomarkers and therapeutic targets in the setting of HNSCC. lncRNAs can also be found in a range of bodily fluids, supporting their potential utility in this area [8, 84–86].

Our study's use of meta-analysis is a valuable approach for evaluating the diagnostic precision of lncRNA in the context of HNSCC. The ability to combine data from multiple studies, increasing sample size, and statistical power to detect minor or moderate effects of lncRNA as diagnostic biomarkers are all advantages of such large-scale reviews of previous studies. It has the potential to reduce the impact of stochastic errors and partialities in single studies, resulting in more precise and reliable diagnostic precision assessments. Statistical techniques were used in this study to investigate the underlying causes of study heterogeneity and inconsistency. Furthermore, we attempted to identify potential moderators or confounders that could affect the diagnostic performance of lncRNA. Despite its benefits, meta-analysis is not without limitations. If the studies used are not sufficiently comprehensive, representative, or rigorous, it may be subject to publication bias, selection bias, or quality bias. When attempting to combine data from various study designs, methodologies, populations, or outcomes, the meta-analysis process may encounter difficulties. This may introduce variability and uncertainty into the final results. It is possible that the meta-analysis did not take into account all of the variables that influence the diagnostic precision of lncRNA, including but not limited to lncRNA characteristics such as type, expression, function, and regulation, detection techniques and platforms, criteria and cut-off values used, and the clinical context and scenarios in which the analysis is performed.

Several variables continue to restrict the quality of data on lncRNAs as diagnostic biomarkers for HNSCC. To begin, lncRNA expression levels might differ based on tissue or cell type, sample collection method, storage conditions, and detection technology. To guarantee the reliability and repeatability of lncRNA measurements, defined techniques and quality control measures are required. Second, little is known about the biological activities and processes of lncRNAs in HNSCC. More research is needed to determine how lncRNAs contribute to the beginning and development of HNSCC, as well as how they interact with other molecules or pathways. Third, the clinical value and validity of lncRNAs as diagnostic biomarkers for HNSCC must be investigated further in large-scale prospective trials with well-defined populations and objectives. lncRNAs' sensitivity, specificity, accuracy, and predictive value should be compared to existing biomarkers or clinical indicators.

Several variables influence the application of data on lncRNAs as diagnostic biomarkers for HNSCC. First, the specificity and sensitivity of lncRNAs for HNSCC should be high enough to



differentiate it from other forms of cancer or benign disorders affecting the head and neck area. Second, lncRNA stability and availability in biological samples should be adequate to enable simple and accurate identification and quantification. Third, the cost-effectiveness and practicality of lncRNA-based testing should be equivalent to or better than current techniques or standards. Fourth, large-scale prospective studies with well-defined cohorts and objectives should be conducted to evaluate the clinical relevance and efficacy of lncRNAs for HNSCC.

## Conclusion

The findings of our study suggest that lncRNAs could potentially function as effective diagnostic biomarkers for cases of HNSCC. This could enhance the current diagnostic methods and provide further understanding of the personalized treatment and management of HNSCC patients. Additional investigation is necessary to validate the clinical efficacy of lncRNAs in a broader range of patients with HNSCC, as well as to elucidate the underlying mechanisms through which lncRNAs participate in the pathogenesis of HNSCC. Furthermore, further research is required to discover novel lncRNAs associated with the growth and advancement of HNSCC. Subsequent investigations ought to utilize high-throughput sequencing methodologies and bioinformatics software to ascertain the expression profiles and signatures of lncRNAs in both lymph node tissues and circulating fluids.

## Supporting information

**S1 Table. Search strategy for each database.**

(DOCX)

**S2 Table. Excluded studies.**

(DOCX)

**S3 Table. PRISMA 2020 checklist.**

(DOCX)

## Author Contributions

**Conceptualization:** Mahdi Masrour, Shaghayegh Khanmohammadi, Nima Rezaei.

**Data curation:** Mahdi Masrour, Shaghayegh Khanmohammadi, Parisa Fallahtafi.

**Investigation:** Mahdi Masrour, Shaghayegh Khanmohammadi, Parisa Fallahtafi.

**Methodology:** Mahdi Masrour, Shaghayegh Khanmohammadi, Nima Rezaei.

**Project administration:** Mahdi Masrour, Shaghayegh Khanmohammadi, Parisa Fallahtafi, Nima Rezaei.

**Resources:** Mahdi Masrour, Shaghayegh Khanmohammadi, Nima Rezaei.

**Software:** Mahdi Masrour, Shaghayegh Khanmohammadi.

**Supervision:** Mahdi Masrour, Shaghayegh Khanmohammadi, Nima Rezaei.

**Validation:** Mahdi Masrour, Shaghayegh Khanmohammadi, Nima Rezaei.

**Visualization:** Mahdi Masrour, Shaghayegh Khanmohammadi, Parisa Fallahtafi.

**Writing – original draft:** Mahdi Masrour, Shaghayegh Khanmohammadi, Parisa Fallahtafi, Nima Rezaei.

**Writing – review & editing:** Mahdi Masrour, Shaghayegh Khanmohammadi, Parisa Fallah-tafti, Nima Rezaei.

## References

1. Johnson DE, Burtneß B, Leemans CR, Lui VWY, Bauman JE, Grandis JR. Head and neck squamous cell carcinoma. *Nat Rev Dis Primers*. 2020; 6(1):92. <https://doi.org/10.1038/s41572-020-00224-3> PMID: 33243986
2. Bray F, Ferlay J, Soerjomataram I, Siegel RL, Torre LA, Jemal A. Global cancer statistics 2018: GLOBOCAN estimates of incidence and mortality worldwide for 36 cancers in 185 countries. *CA Cancer J Clin*. 2018; 68(6):394–424. <https://doi.org/10.3322/caac.21492> PMID: 30207593
3. Shield KD, Ferlay J, Jemal A, Sankaranarayanan R, Chaturvedi AK, Bray F, et al. The global incidence of lip, oral cavity, and pharyngeal cancers by subsite in 2012. *CA Cancer J Clin*. 2017; 67(1):51–64. <https://doi.org/10.3322/caac.21384> PMID: 28076666
4. Zhi X, Lamperska K, Golusinski P, Schork NJ, Luczewski L, Kolenda T, et al. Gene expression analysis of head and neck squamous cell carcinoma survival and recurrence. *Oncotarget*. 2015; 6(1):547–55. <https://doi.org/10.18632/oncotarget.2772> PMID: 25575813
5. Bhave SL, Teknos TN, Pan Q. Molecular parameters of head and neck cancer metastasis. *Crit Rev Eukaryot Gene Expr*. 2011; 21(2):143–53. <https://doi.org/10.1615/critreveukargeneexpr.v21.i2.40> PMID: 22077153
6. Pynnonen MA, Gillespie MB, Roman B, Rosenfeld RM, Tunkel DE, Bontempo L, et al. Clinical Practice Guideline: Evaluation of the Neck Mass in Adults. *Otolaryngol Head Neck Surg*. 2017; 157(2\_suppl): S1–s30. <https://doi.org/10.1177/0194599817722550> PMID: 28891406
7. Shanmugam A, Hariharan AK, Hasina R, Nair JR, Katragadda S, Irusappan S, et al. Ultrasensitive detection of tumor-specific mutations in saliva of patients with oral cavity squamous cell carcinoma. *Cancer*. 2021; 127(10):1576–89. <https://doi.org/10.1002/cncr.33393> PMID: 33405231
8. Guglas K, Bogaczyńska M, Kolenda T, Rys M, Teresiak A, Bliźniak R, et al. lncRNA in HNSCC: Challenges and potential. *Wspolczesna Onkologia*. 2017; 21(4):259–66. <https://doi.org/10.5114/wo.2017.72382> PMID: 29416430
9. Santos DAR, Gaitero C, Santos M, Santos L, Dinis-Ribeiro M, Lima L. MicroRNA Biomarkers as Promising Tools for Early Colorectal Cancer Screening—A Comprehensive Review. *Int J Mol Sci*. 2023; 24(13). <https://doi.org/10.3390/ijms241311023> PMID: 37446201
10. O'Brien SJ, Bishop C, Hallion J, Fiechter C, Scheurlen K, Paas M, et al. Long non-coding RNA (lncRNA) and epithelial-mesenchymal transition (EMT) in colorectal cancer: a systematic review. *Cancer Biol Ther*. 2020; 21(9):769–81. <https://doi.org/10.1080/15384047.2020.1794239> PMID: 32730165
11. Xiao Y, Qiu M, Tan C, Huang W, Hu S, Jiang X, et al. Systematic analysis of circRNA biomarkers for diagnosis, prognosis and therapy in colorectal cancer. *Front Genet*. 2022; 13:938672. <https://doi.org/10.3389/fgene.2022.938672> PMID: 36313458
12. Garrido-Palacios A, Rojas Carvajal AM, Núñez-Negrillo AM, Cortés-Martín J, Sánchez-García JC, Aguilar-Cordero MJ. MicroRNA Dysregulation in Early Breast Cancer Diagnosis: A Systematic Review and Meta-Analysis. *Int J Mol Sci*. 2023; 24(9). <https://doi.org/10.3390/ijms24098270> PMID: 37175974
13. Gao X, Xu J, Cao F, Chen F, Chen T, Li H, et al. Diagnostic Role of Long Non-Coding RNAs in Breast Cancer: a Systematic Review and Meta-Analysis. *Clin Lab*. 2021; 67(3). <https://doi.org/10.7754/Clin.Lab.2020.200662> PMID: 33739040
14. Piergentili R, Gullo G, Basile G, Gulia C, Porrello A, Cucinella G, et al. Circulating miRNAs as a Tool for Early Diagnosis of Endometrial Cancer—Implications for the Fertility-Sparing Process: Clinical, Biological, and Legal Aspects. *Int J Mol Sci*. 2023; 24(14). <https://doi.org/10.3390/ijms241411356> PMID: 37511115
15. Piergentili R, Zaami S, Cavaliere AF, Signore F, Scambia G, Mattei A, et al. Non-Coding RNAs as Prognostic Markers for Endometrial Cancer. *Int J Mol Sci*. 2021; 22(6).
16. Li J, Zhang Y, Xu Q, Zhang Y, Bei S, Ding Y, et al. Diagnostic value of circulating lncRNAs for gastric cancer: A systematic review and meta-analysis. *Front Oncol*. 2022; 12:1058028. <https://doi.org/10.3389/fonc.2022.1058028> PMID: 36561519
17. Aalami AH, Aalami F, Sahebkar A. Gastric Cancer and Circulating microRNAs: An Updated Systematic Review and Diagnostic Meta-Analysis. *Curr Med Chem*. 2023; 30(33):3798–814. <https://doi.org/10.2174/0929867330666221121155905> PMID: 36411580
18. Cao J, Zhang M, Zhang L, Lou J, Zhou F, Fang M. Non-coding RNA in thyroid cancer—Functions and mechanisms. *Cancer Letters*. 2021; 496:117–26. <https://doi.org/10.1016/j.canlet.2020.08.021> PMID: 32949678

19. Jing W, Li X, Peng R, Lv S, Zhang Y, Cao Z, et al. The diagnostic and prognostic significance of long noncoding RNAs expression in thyroid cancer: A systematic review and meta-analysis. *Pathol Res Pract*. 2018; 214(3):327–34. <https://doi.org/10.1016/j.prp.2018.01.008> PMID: 29487006
20. Geropoulos G, Psarras K, Papaioannou M, Giannis D, Meitanidou M, Kapriniotis K, et al. Circulating microRNAs and Clinicopathological Findings of Papillary Thyroid Cancer: A Systematic Review. *In Vivo*. 2022; 36(4):1551–69. <https://doi.org/10.21873/invivo.12866> PMID: 35738604
21. Yuan X, Mao Y, Ou S. Diagnostic accuracy of circulating exosomal circRNAs in malignances: A meta-analysis and systematic review. *Medicine (Baltimore)*. 2023; 102(21):e33872. <https://doi.org/10.1097/MD.00000000000033872> PMID: 37233410
22. Wu Z, Xu Z, Yu B, Zhang J, Yu B. The Potential Diagnostic Value of Exosomal Long Noncoding RNAs in Solid Tumors: A Meta-Analysis and Systematic Review. *Biomed Res Int*. 2020; 2020:6786875. <https://doi.org/10.1155/2020/6786875> PMID: 32879887
23. Piergentili R, Basile G, Nocella C, Carnevale R, Marinelli E, Patrone R, et al. Using ncRNAs as Tools in Cancer Diagnosis and Treatment-The Way towards Personalized Medicine to Improve Patients' Health. *Int J Mol Sci*. 2022; 23(16). <https://doi.org/10.3390/ijms23169353> PMID: 36012617
24. Lamperska KM, Kozłowski P, Kolenda T, Teresiak A, Blizniak R, Przybyla W, et al. Unpredictable changes of selected miRNA in expression profile of HNSCC. *Cancer Biomark*. 2016; 16(1):55–64. <https://doi.org/10.3233/CBM-150540> PMID: 26484611
25. Victoria Martinez B, Dhahbi JM, Nunez Lopez YO, Lamperska K, Golusinski P, Luczewski L, et al. Circulating small non-coding RNA signature in head and neck squamous cell carcinoma. *Oncotarget*. 2015; 6(22):19246–63. <https://doi.org/10.18632/oncotarget.4266> PMID: 26057471
26. Iyer MK, Niknafs YS, Malik R, Singhal U, Sahu A, Hosono Y, et al. The landscape of long noncoding RNAs in the human transcriptome. *Nat Genet*. 2015; 47(3):199–208. <https://doi.org/10.1038/ng.3192> PMID: 25599403
27. Yarmishyn AA, Kurochkin IV. Long noncoding RNAs: a potential novel class of cancer biomarkers. *Front Genet*. 2015; 6:145. <https://doi.org/10.3389/fgene.2015.00145> PMID: 25954300
28. Lorenzi L, Avila Cobos F, Decock A, Everaert C, Helmsmoortel H, Lefever S, et al. Long noncoding RNA expression profiling in cancer: Challenges and opportunities. *Genes Chromosomes Cancer*. 2019; 58(4):191–9. <https://doi.org/10.1002/gcc.22709> PMID: 30461116
29. Gibb EA, Enfield KS, Stewart GL, Lonergan KM, Chari R, Ng RT, et al. Long non-coding RNAs are expressed in oral mucosa and altered in oral premalignant lesions. *Oral Oncol*. 2011; 47(11):1055–61. <https://doi.org/10.1016/j.oraloncology.2011.07.008> PMID: 21835683
30. Wu Y, Zhang L, Zhang L, Wang Y, Li H, Ren X, et al. Long non-coding RNA HOTAIR promotes tumor cell invasion and metastasis by recruiting EZH2 and repressing E-cadherin in oral squamous cell carcinoma. *International Journal of Oncology*. 2015; 46(6):2586–94. <https://doi.org/10.3892/ijo.2015.2976> PMID: 25901533
31. Wu J, Xie H. Expression of long noncoding RNA-HOX transcript antisense intergenic RNA in oral squamous cell carcinoma and effect on cell growth. *Tumour Biol*. 2015; 36(11):8573–8. <https://doi.org/10.1007/s13277-015-3598-5> PMID: 26036760
32. Li DD, Feng JP, Wu TY, Wang YD, Sun YN, Ren JY, et al. Long Intergenic Noncoding RNA HOTAIR Is Overexpressed and Regulates PTEN Methylation in Laryngeal Squamous Cell Carcinoma. *AMERICAN JOURNAL OF PATHOLOGY*. 2013; 182(1):64–70. <https://doi.org/10.1016/j.ajpath.2012.08.042> PMID: 23141928
33. Fang Z, Wu L, Wang L, Yang Y, Meng Y, Yang H. Increased expression of the long non-coding RNA UCA1 in tongue squamous cell carcinomas: a possible correlation with cancer metastasis. *Oral Surg Oral Med Oral Pathol Oral Radiol*. 2014; 117(1):89–95. <https://doi.org/10.1016/j.oooo.2013.09.007> PMID: 24332332
34. Tang H, Wu Z, Zhang J, Su B. Salivary lncRNA as a potential marker for Oral squamous cell carcinoma diagnosis. *Molecular Medicine Reports*. 2013; 7(3):761–6. <https://doi.org/10.3892/mmr.2012.1254> PMID: 23292713
35. Zhou X, Liu S, Cai G, Kong L, Zhang T, Ren Y, et al. Long Non Coding RNA MALAT1 Promotes Tumor Growth and Metastasis by inducing Epithelial-Mesenchymal Transition in Oral Squamous Cell Carcinoma. *Scientific reports*. 2015; 5:15972. <https://doi.org/10.1038/srep15972> PMID: 26522444
36. Chen H, Xin Y, Zhou L, Huang JM, Tao L, Cheng L, et al. Cisplatin and paclitaxel target significant long noncoding RNAs in laryngeal squamous cell carcinoma. *Medical Oncology*. 2014; 31(11). <https://doi.org/10.1007/s12032-014-0246-7> PMID: 25257554
37. Moher D, Liberati A, Tetzlaff J, Altman DG. Preferred reporting items for systematic reviews and meta-analyses: the PRISMA statement. *PLoS Med*. 2009; 6(7):e1000097. <https://doi.org/10.1371/journal.pmed.1000097> PMID: 19621072

38. Yang B, Mallett S, Takwoingi Y, Davenport CF, Hyde CJ, Whiting PF, et al. QUADAS-C: A Tool for Assessing Risk of Bias in Comparative Diagnostic Accuracy Studies. *Ann Intern Med.* 2021; 174(11):1592–9. <https://doi.org/10.7326/M21-2234> PMID: 34698503
39. Reitsma JB, Glas AS, Rutjes AW, Scholten RJ, Bossuyt PM, Zwinderman AH. Bivariate analysis of sensitivity and specificity produces informative summary measures in diagnostic reviews. *J Clin Epidemiol.* 2005; 58(10):982–90. <https://doi.org/10.1016/j.jclinepi.2005.02.022> PMID: 16168343
40. Salgado J. Transforming the Area under the Normal Curve (AUC) into Cohen's d, Pearson's r pb, Odds-Ratio, and Natural Log Odds-Ratio: Two Conversion Tables. *The European Journal of Psychology Applied to Legal Context.* 2018; 10:35–47.
41. Yao Y, Chen X, Lu S, Zhou C, Xu G, Yan Z, et al. Circulating Long Noncoding RNAs as Biomarkers for Predicting Head and Neck Squamous Cell Carcinoma. *Cellular Physiology and Biochemistry.* 2018; 50(4):1429–40. <https://doi.org/10.1159/000494605> PMID: 30355951
42. Wu B, Liu J, Wang B, Liao X, Cui Z, Ding N. Association on polymorphisms in LncRNA HOTAIR and susceptibility to HNSCC in Chinese population. *European Review for Medical and Pharmacological Sciences.* 2018; 22(3):702–6. [https://doi.org/10.26355/eurev\\_201802\\_14296](https://doi.org/10.26355/eurev_201802_14296) PMID: 29461598
43. Aktan C, Kucukaslan A, Cengiz A, Demirci M, Sunter A, Baygöl A, et al. Expression of salivary LINC01206, LINC01209, LINC01994, and ABCC5-AS1 may serve as diagnostic tools in laryngeal cancer. *Gene Reports.* 2022; 29:101706.
44. Łasińska I, Kolenda T, Guglas K, Kopczyńska M, Sobocińska J, Teresiak A, et al. Liquid lncRNA biopsy for the evaluation of locally advanced and metastatic squamous cell carcinomas of the head and neck. *Journal of Personalized Medicine.* 2020; 10(3):1–21. <https://doi.org/10.3390/jpm10030131> PMID: 32947877
45. Shen ZS, Li Q, Deng HX, Lu DK, Song HJ, Guo JM. Long Non-Coding RNA Profiling in Laryngeal Squamous Cell Carcinoma and Its Clinical Significance: Potential Biomarkers for LSCC. *PLOS ONE.* 2014; 9(9). <https://doi.org/10.1371/journal.pone.0108237> PMID: 25243407
46. Shen Z, Wu L, Hao W, Li Q, Zhou C. Expression of the long noncoding RNA RP11-169D4.1-001 in Hypopharyngeal Squamous cell carcinoma tissue and its clinical significance. *J Clin Lab Anal.* 2020; 34(1):e23019. <https://doi.org/10.1002/jcla.23019> PMID: 31512299
47. Bozgeyik E, Ege B, Koparal M, Ceylan O. Clinical significance of Vimentin Antisense RNA 1 and its correlation with other epithelial to mesenchymal transition markers in oral cancers. *Pathology Research and Practice.* 2022;232. <https://doi.org/10.1016/j.prp.2022.153807> PMID: 35202907
48. Wang J, Zhou Y, Lu J, Sun Y, Xiao H, Liu M, et al. Combined detection of serum exosomal miR-21 and HOTAIR as diagnostic and prognostic biomarkers for laryngeal squamous cell carcinoma. *Med Oncol.* 2014; 31(9):148. <https://doi.org/10.1007/s12032-014-0148-8> PMID: 25099764
49. Shieh TM, Liu CJ, Hsia SM, Ningrum V, Liao CC, Lan WC, et al. Lack of salivary long non-coding rna xist expression is associated with increased risk of oral squamous cell carcinoma: A cross-sectional study. *Journal of Clinical Medicine.* 2021; 10(19). <https://doi.org/10.3390/jcm10194622> PMID: 34640640
50. Aghiorghiese O, Zanoaga O, Raduly L, Aghiorghiese AI, Chiroi P, Trif A, et al. Dysregulation of miR-21-5p, miR-93-5p, miR-200c-3p and miR-205-5p in Oral Squamous Cell Carcinoma: A Potential Biomarkers Panel? *Current Issues in Molecular Biology.* 2022; 44(4):1754–67. <https://doi.org/10.3390/cimb44040121> PMID: 35723379
51. Zheng X, Tian X, Zhang Q, Shi P, Li S. Long non-coding RNA SAMMSON as a novel potential diagnostic and prognostic biomarker for oral squamous cell carcinoma. *J Dent Sci.* 2020; 15(3):329–35. <https://doi.org/10.1016/j.jds.2019.11.008> PMID: 32952891
52. Giragosyan S, Petkova V, Popov T, Mitev V, Kaneva R. MiR-145-5 p, miR-196a-5p, miR-222-3 p and lncRNA malat1 as non-invasive markers in advanced laryngeal squamous cell carcinoma. *ESMO Open.* 2018; 3:A368–A9.
53. Liu DM, Yang H, Yuan ZN, Yang XG, Pei R, He HJ. Long noncoding RNA LINC01194 enhances the malignancy of laryngeal squamous cell carcinoma by sponging miR-655 to increase SOX18 expression. *Biochemical and Biophysical Research Communications.* 2020; 529(2):148–55. <https://doi.org/10.1016/j.bbrc.2020.05.178> PMID: 32703403
54. Yuan SJ, Li SY, Wang YH, Zhang HF, Hua Y, Wang T. The clinical significance, prognostic value and biological role of lncRNA LINC01793 in oral squamous cell carcinoma. *Archives of oral biology.* 2021; 125:105105. <https://doi.org/10.1016/j.archoralbio.2021.105105> PMID: 33713982
55. Dong Y, Wu W. Downregulation of lncRNA CASC2 promotes the postoperative local recurrence of early oral squamous cell carcinoma. *European Archives of Oto-Rhino-Laryngology.* 2019; 276(2):605–10. <https://doi.org/10.1007/s00405-018-5209-8> PMID: 30467776
56. Zhang P, Liu Y, Li C, Zhang L, Liu Q, Jiang T. LncRNA PAPAS promotes oral squamous cell carcinoma by upregulating transforming growth factor-β1. *Journal of Cellular Biochemistry.* 2019; 120(9):16120–7.

57. Shao T, Huang J, Zheng Z, Wu Q, Liu T, Lv X. SCCA, TSGF, and the Long Non-Coding RNA AC007271.3 are Effective Biomarkers for Diagnosing Oral Squamous Cell Carcinoma. *Cellular Physiology and Biochemistry*. 2018; 47(1):26–38. <https://doi.org/10.1159/000489741> PMID: 29763905
58. Cui XY, Fang N, Cui Y, Xiao D, Wang X. Long non-coding RNA NEF inhibits proliferation and promotes apoptosis of laryngeal squamous cell carcinoma cells by inhibiting Wnt/catenin signaling. *ONCOLOGY LETTERS*. 2019; 17(6):4928–34.
59. Le F, Ou Y, Luo P, Zhong X. LncRNA NCK1-AS1 in plasma distinguishes oral ulcer from early-stage oral squamous cell carcinoma. *J Biol Res (Thessalon)*. 2020; 27:16. <https://doi.org/10.1186/s40709-020-00126-1> PMID: 33194849
60. Zhang XY, Guo B, Zhu Y, Xu WL, Ning SB, Liu L. Up-regulation of plasma lncRNA CACS15 distinguished early-stage oral squamous cell carcinoma patient. *ORAL DISEASES*. 2020; 26(8):1619–24. <https://doi.org/10.1111/odi.13245> PMID: 31793142
61. Gao Y, Wang Z, Tong J, Zheng Y. LncRNA loc285194 inhibits tumor growth of laryngeal squamous cell carcinoma cells by downregulating hexokinase 2. *Experimental and Therapeutic Medicine*. 2019; 18(4):2378–84. <https://doi.org/10.3892/etm.2019.7761> PMID: 31555348
62. Sun S, Gong C, Yuan K. Lncrna uca1 promotes cell proliferation, invasion and migration of laryngeal squamous cell carcinoma cells by activating wnt/ $\beta$ -catenin signaling pathway. *Experimental and Therapeutic Medicine*. 2019; 17(2):1182–9.
63. Pirhoushiaran M, Hesami S, Ehtesham N, Mehrabi S, Shirkoobi R, Yazdani N, et al. Gene expression profiling and clinicopathological importance of Fer1L4 and DANCR long non coding RNAs in patients with Head and Neck Squamous Cell Carcinoma. *Journal of Clinical and Diagnostic Research*. 2021; 15(9):GC01–GC6.
64. Yuan J, Xu XJ, Lin Y, Chen QY, Sun WJ, Tang L, et al. LncRNA MALAT1 expression inhibition suppresses tongue squamous cell carcinoma proliferation, migration and invasion by inactivating PI3K/Akt pathway and downregulating MMP-9 expression. *Eur Rev Med Pharmacol Sci*. 2019; 23(1):198–206. [https://doi.org/10.26355/eurrev\\_201901\\_16765](https://doi.org/10.26355/eurrev_201901_16765) PMID: 30657561
65. Wang X, Yang S, Lv X, Wang L, Li C. Overexpression of lncrna snhg1 were suitable for oncolytic adenovirus h101 therapy in oral squamous-cell carcinoma. *Oncotargets and Therapy*. 2020; 13:13033–9. <https://doi.org/10.2147/OTT.S285536> PMID: 33376352
66. Chi Y, Wang D, Wang J, Yu W, Yang J. Long Non-Coding RNA in the Pathogenesis of Cancers. *Cells*. 2019; 8(9). <https://doi.org/10.3390/cells8091015> PMID: 31480503
67. Badowski C, He B, Garmire LX. Blood-derived lncRNAs as biomarkers for cancer diagnosis: the Good, the Bad and the Beauty. *NPJ Precis Oncol*. 2022; 6(1):40. <https://doi.org/10.1038/s41698-022-00283-7> PMID: 35729321
68. Yang Y, Chen D, Liu H, Yang K. Increased expression of lncRNA CASC9 promotes tumor progression by suppressing autophagy-mediated cell apoptosis via the AKT/mTOR pathway in oral squamous cell carcinoma. *Cell Death and Disease*. 2019; 10(2). <https://doi.org/10.1038/s41419-018-1280-8> PMID: 30674868
69. Liu M, Gao X, Liu CL. Increased expression of lncRNA FTH1P3 promotes oral squamous cell carcinoma cells migration and invasion by enhancing PI3K/Akt/ GSK3b/ Wnt/ $\beta$ -catenin signaling. *European Review for Medical and Pharmacological Sciences*. 2021; 22(23):8306–14.
70. Kolenda T, Guglas K, Kopczyńska M, Teresiak A, Bliźniak R, Mackiewicz A, et al. Oncogenic role of ZFAS1 lncRNA in head and neck squamous cell carcinomas. *Cells*. 2019; 8(4). <https://doi.org/10.3390/cells8040366> PMID: 31010087
71. Che H, Che Y, Zhang Z, Lu Q. Long Non-Coding RNA LINC01929 Accelerates Progression of Oral Squamous Cell Carcinoma by Targeting the miR-137-3p/FOXO1 Axis. *Frontiers in Oncology*. 2021; 11. <https://doi.org/10.3389/fonc.2021.657876> PMID: 33968763
72. Wang WJ, Li CJ, Qiu YL, Li KS, Lu YT, Deng QL, et al. Maternally expressed 3 inhibits the biological activity of oral squamous cell carcinoma SCC25 and CAL27 cell lines. *ONCOLOGY LETTERS*. 2021; 22(5). <https://doi.org/10.3892/ol.2021.13045> PMID: 34594425
73. Mao B, Wang F, Zhang JX, Li QQ, Ying K. Long non-coding RNA human leucocyte antigen complex group-18 HCG18 (HCG18) promoted cell proliferation and migration in head and neck squamous cell carcinoma through cyclin D1-WNT pathway. *BIOENGINEERED*. 2022; 13(4):9425–34. <https://doi.org/10.1080/21655979.2022.2060452> PMID: 35389764
74. Yang L, Lu P, Yang X, Li K, Chen X, Qu S. Excavating novel diagnostic and prognostic long non-coding RNAs (lncRNAs) for head and neck squamous cell carcinoma: an integrated bioinformatics analysis of competing endogenous RNAs (ceRNAs) and gene co-expression networks. *Bioengineered*. 2021; 12(2):12821–38. <https://doi.org/10.1080/21655979.2021.2003925> PMID: 34898376
75. Jiang YY, Guo HY, Tong T, Xie F, Qin X, Wang XN, et al. lncRNA lnc-POP1-1 upregulated by VN1R5 promotes cisplatin resistance in head and neck squamous cell carcinoma through interaction with

- MCM5. MOLECULAR THERAPY. 2022; 30(1):448–67. <https://doi.org/10.1016/j.ymthe.2021.06.006> PMID: 34111560
76. Tan DSW, Chong FT, Leong HS, Toh SY, Lau DP, Kwang XL, et al. Long noncoding RNA EGFR-AS1 mediates epidermal growth factor receptor addiction and modulates treatment response in squamous cell carcinoma. *Nature Medicine*. 2017; 23(10):1167–75. <https://doi.org/10.1038/nm.4401> PMID: 28920960
  77. Fayda M, Isin M, Tambas M, Guveli M, Meral R, Altun M, et al. Do circulating long non-coding RNAs (lncRNAs) (LincRNA-p21, GAS 5, HOTAIR) predict the treatment response in patients with head and neck cancer treated with chemoradiotherapy? *Tumour Biol*. 2016; 37(3):3969–78. <https://doi.org/10.1007/s13277-015-4189-1> PMID: 26482616
  78. Wang XF, Pan Y, Ou YP, Duan TT, Zou YX, Zhou XJ. Construction and validation of immune-related lncRNAs classifier to predict prognosis and immunotherapy response in laryngeal squamous cell carcinoma. *WORLD JOURNAL OF SURGICAL ONCOLOGY*. 2022; 20(1). <https://doi.org/10.1186/s12957-022-02608-z> PMID: 35606755
  79. Tang Y, Li C, Zhang YJ, Wu ZH. Ferroptosis-Related Long Non-Coding RNA signature predicts the prognosis of Head and neck squamous cell carcinoma. *International journal of biological sciences*. 2021; 17(3):702–11. <https://doi.org/10.7150/ijbs.55552> PMID: 33767582
  80. Kozłowska J, Kolenda T, Poter P, Sobocińska J, Guglas K, Stasiak M, et al. Long intergenic non-coding rnas in HNSCC: From “junk dna” to important prognostic factor. *Cancers*. 2021; 13(12).
  81. Yuan F, Miao Z, Chen W, Wu F, Wei C, Yong J, et al. Long non-coding RNA PHACTR2-AS1 promotes tongue squamous cell carcinoma metastasis by regulating Snail. *J Biochem*. 2020; 168(6):651–7. <https://doi.org/10.1093/jb/mvaa082> PMID: 32702100
  82. Guo Y, Ma Y, Hu X, Song R, Zhu L, Zhong M. Long non-coding RNA CEBPA-AS1 correlates with poor prognosis and promotes tumorigenesis via CEBPA/Bcl2 in oral squamous cell carcinoma. *Cancer Biology and Therapy*. 2018; 19(3):205–13. <https://doi.org/10.1080/15384047.2017.1416276> PMID: 29281558
  83. Chen L, Cai Z, Lyu K, Cai Z, Lei W. A novel immune-related long non-coding RNA signature improves the prognosis prediction in the context of head and neck squamous cell carcinoma. *Bioengineered*. 2021; 12(1):2311–25. <https://doi.org/10.1080/21655979.2021.1943284> PMID: 34167440
  84. Jiang M, Liu F, Yang AG, Wang W, Zhang R. The role of long non-coding RNAs in the pathogenesis of head and neck squamous cell carcinoma. *Molecular Therapy—Oncolytics*. 2022; 24:127–38. <https://doi.org/10.1016/j.omto.2021.12.001> PMID: 35024439
  85. Hu Y, Guo G, Li J, Chen J, Tan P. Screening key lncRNAs with diagnostic and prognostic value for head and neck squamous cell carcinoma based on machine learning and mRNA-lncRNA co-expression network analysis. *Cancer Biomarkers*. 2020; 27(2):195–206. <https://doi.org/10.3233/CBM-190694> PMID: 31815689
  86. Li M, Ding X, Zhang Y, Li X, Zhou H, Yang L, et al. Antisense oligonucleotides targeting lncRNA AC104041.1 induces antitumor activity through Wnt2B/β-catenin pathway in head and neck squamous cell carcinomas. *Cell Death & Disease*. 2020; 11(8).
  87. Jiang M, Liu F, Yang A-G, Wang W, Zhang R. The role of long non-coding RNAs in the pathogenesis of head and neck squamous cell carcinoma. *Molecular Therapy—Oncolytics*. 2022; 24:127–38. <https://doi.org/10.1016/j.omto.2021.12.001> PMID: 35024439
  88. Xie J, Huang L, Lu YG, Zheng DL. Roles of the Wnt Signaling Pathway in Head and Neck Squamous Cell Carcinoma. *Front Mol Biosci*. 2020; 7:590912. <https://doi.org/10.3389/fmolb.2020.590912> PMID: 33469547
  89. Chaudhary R, Wang X, Cao B, De La Iglesia J, Masannat J, Song F, et al. Long noncoding RNA, LINC00460, as a prognostic biomarker in head and neck squamous cell carcinoma (HNSCC). *Am J Transl Res*. 2020; 12(2):684–96. PMID: 32194915
  90. Ye D, Deng Y, Shen Z. The role and mechanism of malat1 long non-coding rna in the diagnosis and treatment of head and neck squamous cell carcinoma. *OncoTargets and Therapy*. 2021; 14:4127–36. <https://doi.org/10.2147/OTT.S317234> PMID: 34267526
  91. Zhou J, Li W, Jin T, Xiang X, Li M, Wang J, et al. Gene microarray analysis of lncRNA and mRNA expression profiles in patients with hypopharyngeal squamous cell carcinoma. *International Journal of Clinical and Experimental Medicine*. 2015; 8(4):4862–82. PMID: 26131061
  92. Qian Z, Chen L, Wang X, Kan Y, Wang Y, Yu Y, et al. Increased MALAT1 expression predicts poor prognosis in primary gastrointestinal diffuse large B-cell lymphoma. *Clinical and Experimental Medicine*. 2022; 22(2):183–91. <https://doi.org/10.1007/s10238-021-00748-2> PMID: 34427833
